# Supplementary material for: The Effect of Aquatic Exercise Training on Heart Rate Variability in Patients with Coronary Artery Disease
Source: MDPI journal article supplement (doi:10.3390/jcdd9080251), 2022-08-06
Supplement: s1 [file s1]

**Table S1: Complete set of measurements of HRV parameters (IBI and time-domain) for the three study groups at baseline and after training.**

| Variables                  | Land-exercise group (I)  |                          |           |       | Water-exercise group (II) |                          |            |       | Control group (III)   |                          |           |       | p*                 |
|----------------------------|--------------------------|--------------------------|-----------|-------|---------------------------|--------------------------|------------|-------|-----------------------|--------------------------|-----------|-------|--------------------|
|                            | Before                   | After                    | Δ         | p     | Before                    | After                    | Δ          | p     | Before                | After                    | Δ         | p     |                    |
| <b>IBI</b><br>(count)      | 1388<br>(1196 - 1487)    | 1423<br>(1198 - 1553)    | -<br>35,0 | 0.989 | 1317.5<br>(1174 - 1557)   | 1426<br>(1261 - 1700)    | -<br>108,5 | 0.036 | 1237<br>(1092 - 1425) | 1156<br>(1123 - 1385)    | 81,0      | 0.186 | 0,05               |
| <b>Outliers</b><br>(count) | 14<br>(9 - 20)           | 12 (9 - 19)              | 2,0       | 0.891 | 12.5<br>(9 - 20)          | 13<br>(7 - 18)           | -0,5       | 0.322 | 10 (6 - 18)           | 11 (7 - 20)              | -1,0      | 0.411 | 0.475              |
| <b>Max</b><br>(ms)         | 1088.2<br>(175.5)        | 1085.4<br>(171.6)        | 3,2       | 0.883 | 1068.8<br>(153.6)         | 1007<br>(158.5)          | 61,8       | 0.025 | 1173,2<br>(164.6)     | 1194.8<br>(150.1)        | -<br>21,6 | 0.389 | 0.004<br>(II-III)) |
| <b>Min</b><br>(ms)         | 870<br>(794 - 908)       | 828<br>(746 - 906)       | 42,0      | 0.619 | 808<br>(754 - 884)        | 768.6<br>(672 - 870)     | 39,4       | 0.019 | 938<br>(836 - 1040)   | 946<br>(848 - 1056)      | -8,0      | 0.919 | 0.116              |
| <b>Mean</b><br>(ms)        | 979.9<br>(142,4)         | 963.9<br>(137)           | 16,.      | 0.341 | 959.0<br>(132,2)          | 898.3<br>(132,7)         | 60,7       | 0.014 | 1065,1<br>(136.7)     | 1079.8<br>(133,6)        | -<br>14,7 | 0.473 | 0.002<br>(II-III)  |
| <b>Median</b><br>(ms)      | 981<br>(142.7)           | 964.5<br>(137.5)         | 16,5      | 0.328 | 956.4<br>(133.6)          | 900.7<br>(135.5)         | 55,7       | 0.015 | 1065.7<br>(135.8)     | 1081.9<br>(133.3)        | -<br>16,2 | 0.425 | 0.002<br>(II-III)  |
| <b>SDNN</b><br>(ms)        | 37,1<br>(15.6)           | 35 (16)                  | 2,1       | 0.504 | 39<br>(16.6)              | 35,7<br>(18.3)           | 3,3        | 0.364 | 35.4<br>(13.4)        | 39.3<br>(12.3)           | -3,9      | 0.120 | 0.256              |
| <b>SDANN</b><br>(ms)       | 23.8<br>(19.2 - 31.7)    | 21 (17 - 32.5)           | 2,8       | 0.338 | 26.5<br>(19.7 - 31.7)     | 23.4<br>(17.4 - 27.5)    | 3,1        | 0.354 | 25.2<br>(18.9 - 34)   | 26 (22.7 - 35.9)         | -0,8      | 0.274 | 0.306              |
| <b>NNx</b><br>(count)      | 83.7<br>(142.9)          | 49.9<br>(97)             | 33,8      | 0.175 | 41.6<br>(59.4)            | 53.9<br>(110.9)          | -<br>12,3  | 0.515 | 65.2<br>(144.5)       | 113.7<br>(184.2)         | -<br>49,5 | 0.080 | 0.052              |
| <b>pNNx</b><br>(%)         | 0.4 (0 - 8.2)            | 0.8 (0.2 - 2.5)          | -0,4      | 0.029 | 0.8 (0.5 - 5.6)           | 0.3 (0.1 - 2.7)          | 0,5        | 0.324 | 1.2 (0.2 - 6.4)       | 1.1 (0.3 - 17.9)         | 0,1       | 0.276 | 0.080              |
| <b>RMSSD</b><br>(ms)       | 15,2<br>(10.5 - 30.7)    | 18 (10 - 24)             | -2,8      | 0.126 | 18.9<br>(14.7 - 25.1)     | 14.4<br>(11.8 - 19.7)    | 4,5        | 0.182 | 17.6<br>(14.4 - 26)   | 19.3<br>(14.8 - 37.5)    | -1,7      | 0.307 | 0.095              |
| <b>SDNNi</b><br>(ms)       | 196.9<br>(164.8 - 226.8) | 185.8<br>(171.9 - 226.6) | 11,1      | 0.545 | 199.7<br>(169.6 - 219.6)  | 170.4<br>(150.5 - 209.6) | 29,3       | 0.166 | 195<br>(21.9 - 226)   | 213.6<br>(163.6 - 240.1) | -<br>18,6 | 0.212 | 0.124              |
| <b>meanHR</b><br>(bpm)     | 62.6<br>(9.5)            | 63.5<br>(8.8)            | -0,9      | 0.422 | 64.1<br>(8.7)             | 68.3<br>(9.9)            | -4,2       | 0.012 | 57.3<br>(7.5)         | 56.5<br>(7.4)            | 0,8       | 0.518 | 0.002<br>(II-III)  |
| <b>sdHR</b><br>(bpm)       | 2.3 (0.7)                | 2.3 (0.9)                | 0,0       | 0.925 | 2.6 (1)                   | 2.7 (0.9)                | -0,1       | 0.885 | 1.9 (0.7)             | 2.1 (0.6)                | -0,2      | 0.121 | 0.524              |
| <b>HRVti</b><br>(ms)       | 10.2<br>(1,9)            | 9.6 (2.2)                | 0,6       | 0.278 | 10.9<br>(1.8)             | 10.2<br>(1.7)            | 0,7        | 0.137 | 10.1<br>(2.3)         | 10.4<br>(1.8)            | -0,3      | 0.595 | 0.380              |
| <b>TINN</b><br>(ms)        | 148.9<br>(64.6)          | 140.7<br>(66.7)          | 8,2       | 0.583 | 156.5<br>(64.9)           | 136.8<br>(67.5)          | 19,7       | 0.212 | 141.2<br>(66.8)       | 156.5<br>(59.7)          | -<br>15,3 | 0.224 | 0.248              |

Data are shown as mean (standard deviation) or median (Q1–Q3). *IBI* – inter-beat interval; *SDNN* – standard deviation of all normal R–R (NN) intervals; *SDANN* – standard deviation of the average NN interval calculated over a short period; *NNx* – number of valid adjacent NN values not separated by data breaks; *pNNx* – proportion of valid adjacent RR values not separated by data breaks; *RMSSD* – root mean square of successive NN interval differences; *SDNNi* – mean of the standard deviations of all the NN intervals for each 5 min segment; *SDHR* – standard deviation of heart rate; *HRVti* – heart rate variability triangular index; *TINN* – triangular interpolation interval histogram; *p\** – *p* between groups (ANCOVA).

**Table S2: Complete set of measurements of HRV parameters (frequency domain: Welch) for the three study groups at baseline and after training.**

| Variables                           | Land-exercise group (I)   |                          |           |       | Water-exercise group (II) |                           |           |       | Control group (III)       |                          |                |       | P*                          |
|-------------------------------------|---------------------------|--------------------------|-----------|-------|---------------------------|---------------------------|-----------|-------|---------------------------|--------------------------|----------------|-------|-----------------------------|
|                                     | Before                    | After                    | $\Delta$  | p     | Before                    | After                     | $\Delta$  | p     | Before                    | After                    | $\Delta$       | p     |                             |
| <b>aVLF</b><br>(ms <sup>2</sup> )   | 477<br>(324.8 – 691.7)    | 488.3<br>(298.5 – 832.1) | -<br>11,3 | 0.946 | 560.6<br>(367 – 9239)     | 506.2<br>(285.5 – 747.8)  | 54,4      | 0.439 | 532.3<br>(349.8 – 1074.7) | 699<br>(463 – 1176.5)    | -<br>166,<br>7 | 0.068 | 0,171                       |
| <b>aLF</b><br>(ms <sup>2</sup> )    | 182.8<br>(87.6 – 375.4)   | 114.2<br>(63 – 320.4)    | 68,6      | 0.253 | 229.5<br>(114.6 – 442.7)  | 180<br>(87.5 – 345)       | 49,5      | 0.304 | 170.9<br>(104.9 – 380.6)  | 217.5<br>(137.5 – 394.1) | -<br>46,6      | 0.259 | 0,246                       |
| <b>aHF</b><br>(ms <sup>2</sup> )    | 79.2 (41 – 244.6)         | 88.9<br>(35.3 – 160.9)   | -9,7      | 0.025 | 85 (64.4 – 175.6)         | 58.7<br>(32.4 – 114.5)    | 26,3      | 0.052 | 104.3<br>(44.1 – 272.3)   | 128.3<br>(60.7 – 430.8)  | -24            | 0.290 | 0,033<br>(I-III,<br>II-III) |
| <b>aTotal</b><br>(ms <sup>2</sup> ) | 828.8<br>(506.2 – 1431.9) | 707,5<br>(430,4 – 1545)  | 121,<br>3 | 0.527 | 900<br>(674 – 1543.8)     | 786.9<br>(445.5 – 1013.3) | 113,<br>1 | 0.228 | 872.2<br>(538.3 – 1788.4) | 1121.6<br>(916 – 2036.4) | -<br>249,<br>4 | 0.107 | 0,090                       |
| <b>pVLF</b><br>(%)                  | 67.5<br>(50.7 – 71.9)     | 70.5<br>(66.2 – 75.6)    | -3        | 0.020 | 61.9<br>(55.6 – 71.8)     | 68.1<br>(58.1 – 73.6)     | -6,2      | 0.443 | 60.4<br>(51.9 – 75.3)     | 63.7<br>(56.2 – 74.6)    | -3,3           | 0.524 | 0,466                       |
| <b>pLF</b><br>(%)                   | 22.7<br>(15.7 – 28.9)     | 18.5<br>(11.9 – 24.9)    | 4,2       | 0.038 | 24.7<br>(14.2 – 32.9)     | 22.8<br>(16.7 – 32.5)     | 1,9       | 0.620 | 20 (15.7 – 26.1)          | 20.1 (15 – 24.1)         | -0,1           | 0.665 | 0,322                       |
| <b>pHF</b><br>(%)                   | 9.8 (6.7 – 18.8)          | 8.7 (7.1 – 17.6)         | 1,1       | 0.300 | 9.8 (6.1 – 15)            | 7.3 (5 – 11.4)            | 2,5       | 0.089 | 15.9<br>(5.7 – 26.5)      | 13.3<br>(8.5 – 19.6)     | 2,6            | 0.692 | 0,897                       |
| <b>nLF</b><br>(%)                   | 0.62<br>(0.55 – 0.76)     | 0.67<br>(0.44 – 0.73)    | -<br>0,05 | 0.427 | 0.72<br>(0.54 – 0.8)      | 0.75<br>(0.68 – 0.85)     | -<br>0,03 | 0.062 | 0.63<br>(0.46 – 0.75)     | 0.61<br>(0.44 – 0.74)    | 0,02           | 0.857 | 0,163                       |
| <b>nHF</b><br>(%)                   | 0.38<br>(0.24 – 0.45)     | 0.34<br>(0.27 – 0.56)    | 0,04      | 0.427 | 0.28<br>(0.2 – 0.46)      | 0.25<br>(0.15 – 0.32)     | 0,03      | 0.062 | 0.37<br>(0.25 – 0.54)     | 0.39<br>(0.26 – 0.56)    | -<br>0,02      | 0.857 | 0,163                       |
| <b>LF / HF</b>                      | 1.6 (1.2 – 3.2)           | 2 (0.8 – 2.7)            | -0,4      | 0.510 | 2.6 (1.2 – 4)             | 3 (2.1 – 5.5)             | -0,4      | 0.036 | 1.7 (0.8 – 3)             | 1.5 (0.8 – 2.8)          | 0,2            | 0.981 | 0,066                       |
| <b>peakVLF</b><br>(Hz)              | 0 (0 - 0)                 | 0 (0 - 0)                | 0         | 0.317 | 0 (0 – 0.01)              | 0 (0 - 0)                 | 0         | 0.046 | 0 (0 - 0)                 | 0 (0 - 0)                | 0              | 0.317 | 0,065                       |
| <b>peakLF</b><br>(Hz)               | 0.07<br>(0.04 – 0.12)     | 0.09<br>(0.04 – 0.13)    | -<br>0,02 | 0.715 | 0.05<br>(0.04 – 0.1)      | 0.07<br>(0.04 – 0.1)      | -<br>0,02 | 0.970 | 0.07<br>(0.05 – 0.11)     | 0.09<br>(0.04 – 0.12)    | -<br>0,02      | 0.777 | 0,949                       |
| <b>peakHF</b><br>(Hz)               | 0.26<br>(0.24 – 0.3)      | 0.27<br>(0.23 – 0.3)     | -<br>0,01 | 0.914 | 0.25<br>(0.18 – 0.31)     | 0.27<br>(0.19 – 0.31)     | -<br>0,02 | 0.909 | 0.24<br>(0.2 – 0.3)       | 0.24<br>(0.2 – 0.29)     | 0              | 0.548 | 0,873                       |

Data are shown as mean (standard deviation) or median (Q1-Q3). aVLF – absolute value in very low frequency; aLF – absolute value in low frequency; aHF – absolute value in high frequency; pVLF – power of the very low frequency band; pLF – power of the low frequency band; pHF – power of the high frequency band; aTotal – total power, variance of all NN intervals; nLF – power in the low-frequency range, normalized; nHF – power in the high-frequency range, normalized; LF/HF -ratio of normalized low-and high-frequency power; peakVLF – peak frequency of the very low-frequency band; peakLF – peak frequency of the low-frequency band; peakHF – peak frequency of the high-frequency band. p\* – p between groups (ANCOVA).

**Table S3: Complete set of measurements of HRV parameters (Poincaré and nonlinear) for the three study groups at baseline and after training.**

| Variables          | Land-exercise group (I) |                     |          |       | Water-exercise group (II) |                      |          |       | Control group (III)   |                       |          |       | P*                     |
|--------------------|-------------------------|---------------------|----------|-------|---------------------------|----------------------|----------|-------|-----------------------|-----------------------|----------|-------|------------------------|
|                    | Before                  | After               | $\Delta$ | p     | Before                    | After                | $\Delta$ | p     | Before                | After                 | $\Delta$ | p     |                        |
| <b>SD1</b><br>(ms) | 10.8<br>(7.4 – 21.7)    | 12.7<br>(7.1 – 17)  | -1,9     | 0.130 | 13.3<br>(10.4 – 17.8)     | 10.2<br>(8.4 – 13.9) | 3,1      | 0.187 | 12.4<br>(10.2 – 18.4) | 13.6<br>(10.5 – 26.6) | 1,9      | 0.307 | 0,093                  |
| <b>SD2</b><br>(ms) | 44.4<br>(34.7 – 56.6)   | 40.9<br>(33.9 – 56) | 3,5      | 0.642 | 46.8<br>(37 – 73.8)       | 42.6<br>(31.7 – 51)  | 4,2      | 0.372 | 42.5<br>(32.7 – 60.6) | 48.9<br>(42.9 – 62.1) | -6,4     | 0.138 | 0,383                  |
| <b>SampEn</b>      | 2.1<br>(1.7 – 2.2)      | 1.9<br>(1.7 – 2.1)  | 0,2      | 0.776 | 2<br>(1.7 – 2.2)          | 1.8<br>(1.6 – 2)     | 0,2      | 0.096 | 2.1<br>(1.7 – 2.5)    | 2.1<br>(1.9 – 2.4)    | 0        | 0.789 | 0,090                  |
| <b>Alpha</b>       | 1<br>(0.9 – 1.1)        | 1.1<br>(1.1 – 1.1)  | -0,1     | 0.017 | 1<br>(1 – 1.1)            | 1.1<br>(1 – 1.1)     | -0,1     | 0.525 | 1<br>(1 – 1.1)        | 1<br>(1 – 1.1)        | 0        | 0.962 | 0,104                  |
| <b>Alpha1</b>      | 1.1<br>(0.9 – 1.4)      | 1.1<br>(0.9 – 1.3)  | 0        | 0.545 | 1.2<br>(1.1 – 1.4)        | 1.3<br>(1.2 – 1.5)   | -0,1     | 0.043 | 1.1<br>(0.8 – 1.3)    | 1.1<br>(0.9 – 1.3)    | 0        | 0.764 | 0,205                  |
| <b>Alpha2</b>      | 1<br>(0.9 – 1)          | 1.1<br>(0.9 – 1.1)  | -0,1     | 0.003 | 1<br>(0.9 – 1.1)          | 1<br>(0.9 – 1)       | 0        | 0.970 | 1<br>(0.9 – 1.1)      | 1<br>(0.9 – 1)        | 0        | 0.764 | 0,029<br>(I-II; I-III) |

Data are shown as mean (standard deviation) or median (Q1-Q3). *SD1* – poicare plot standard deviation perpendicular the line of identity; *SD2* – Poincare plot standard deviation along the line of identity; *SampEn* – sample entropy;  $\langle 1$  – detrended fluctuation analysis which describes short – time fluctuation;  $\langle 2$  – detrended fluctuation analysis, which describes long-term fluctuations.

$p^*$  –  $p$  between groups (ANCOVA).

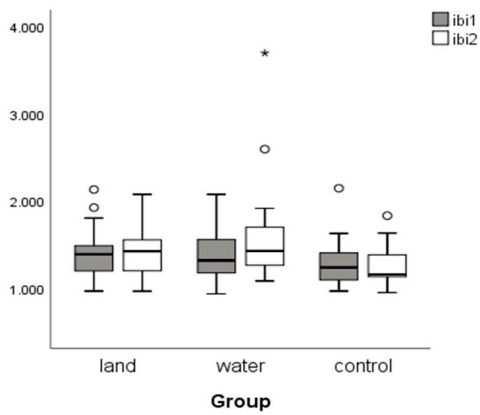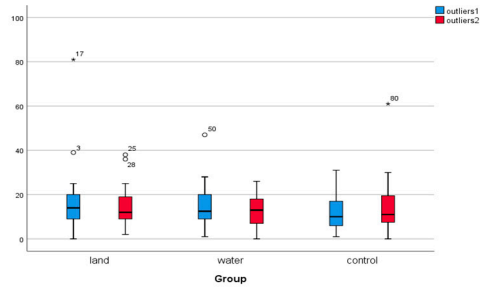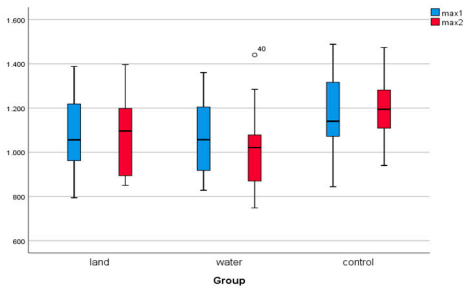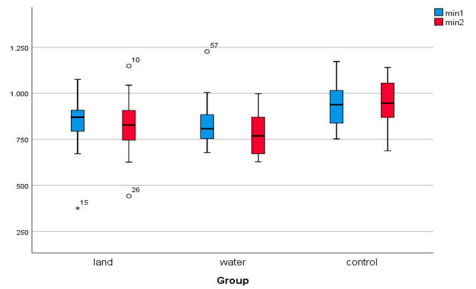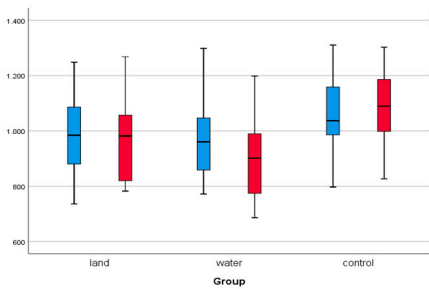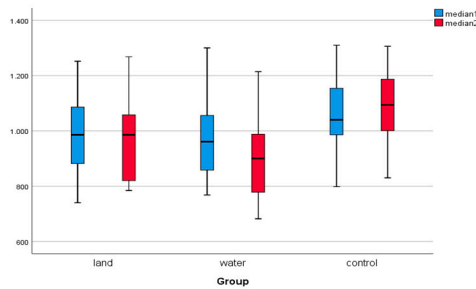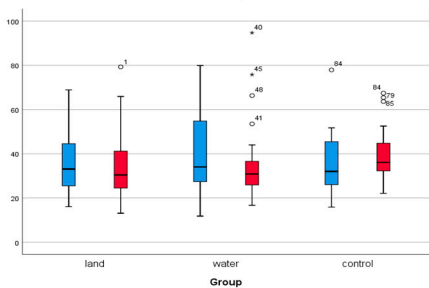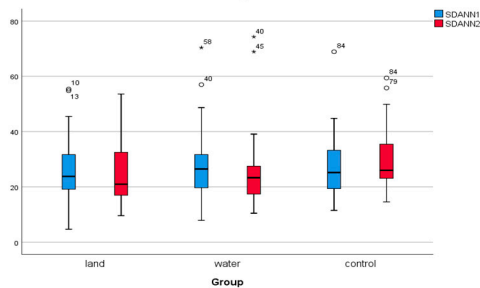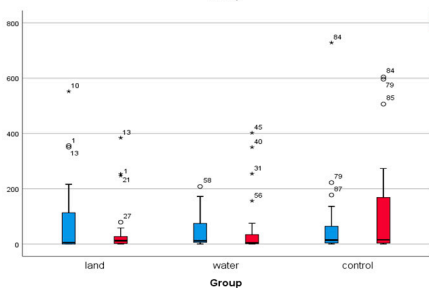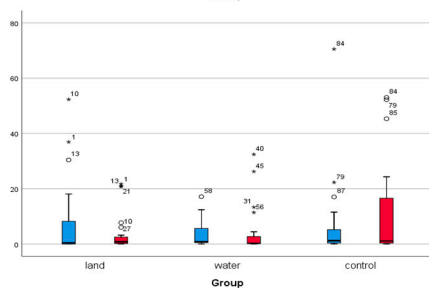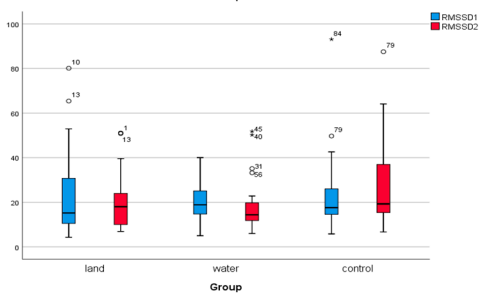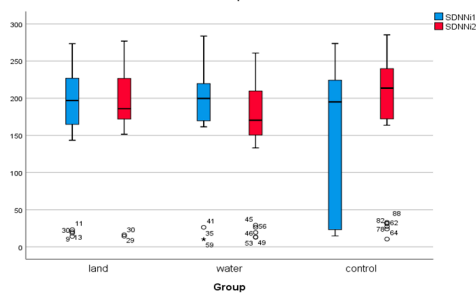

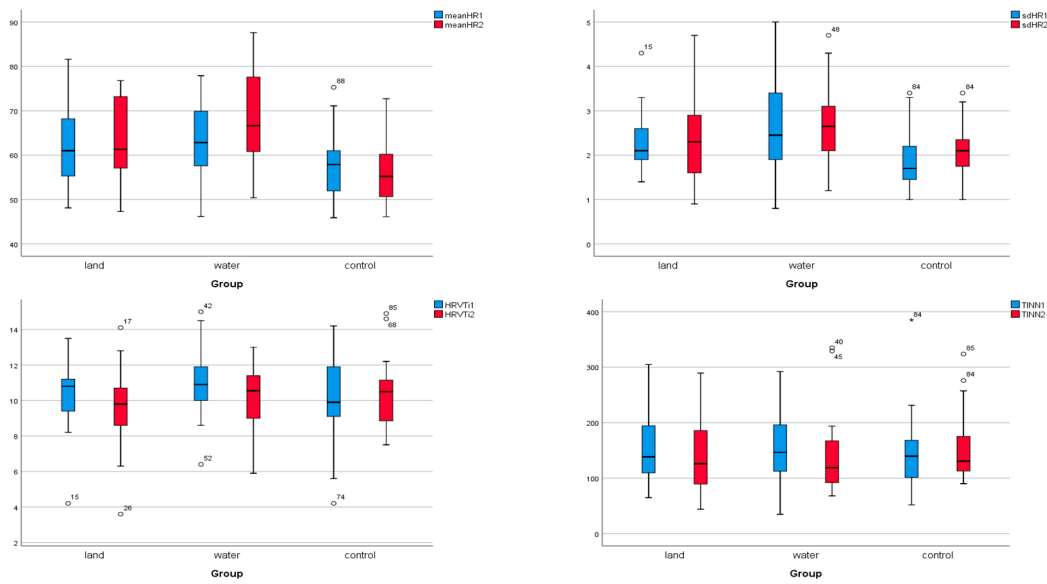

**Figure S1.** Change in time-domain HRV parameters for the each study groups at baseline and after training.

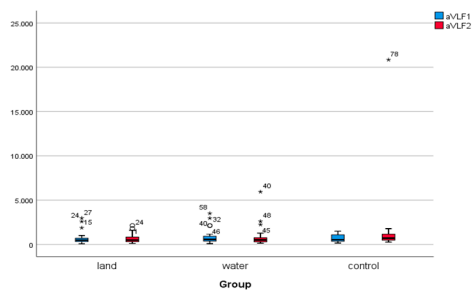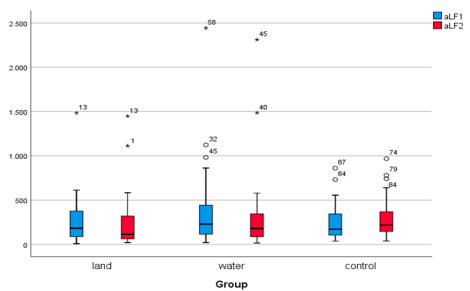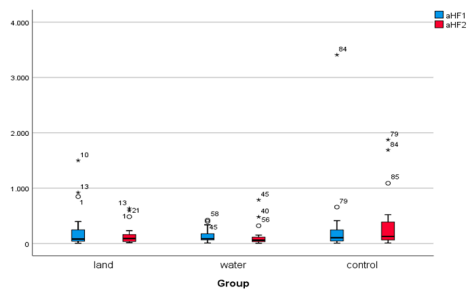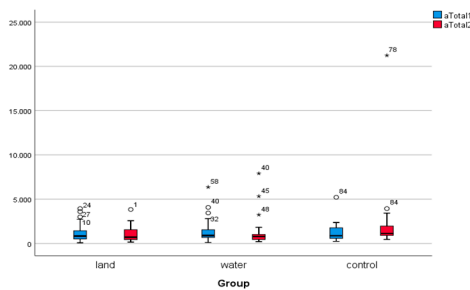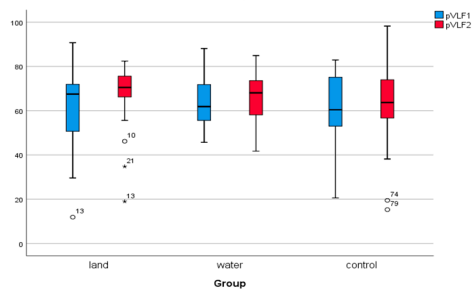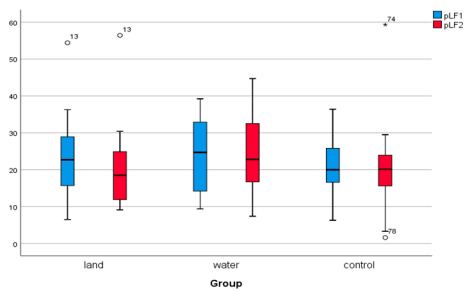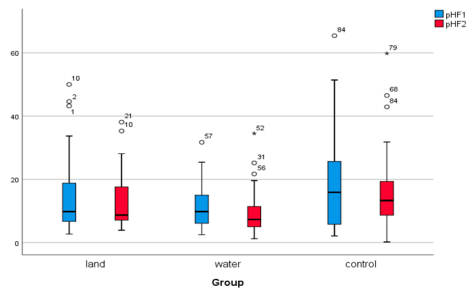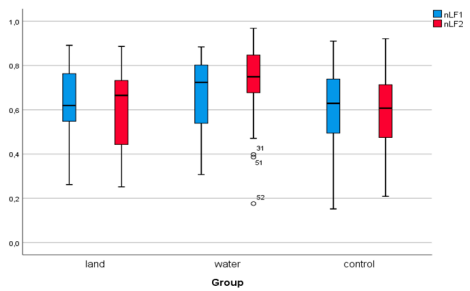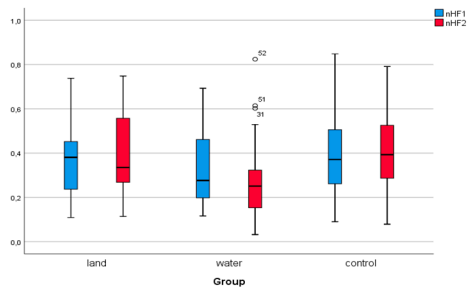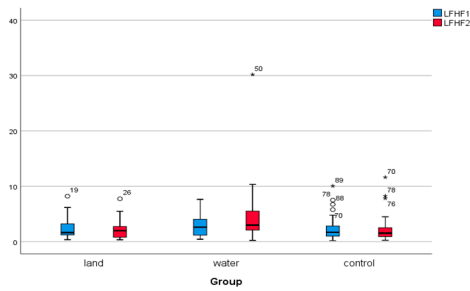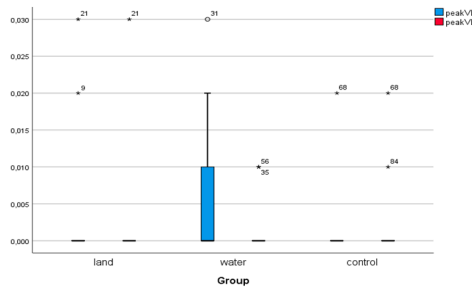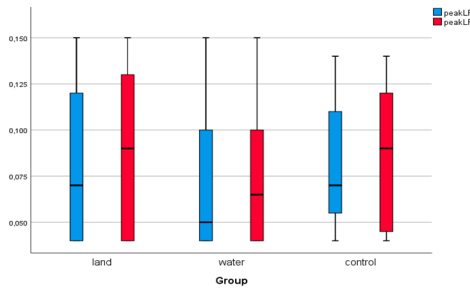

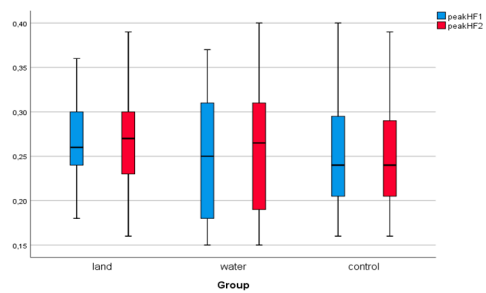

**Figure S2.** Change in frequency domain: Welch – HRV parameters for the three study groups at baseline and after training.

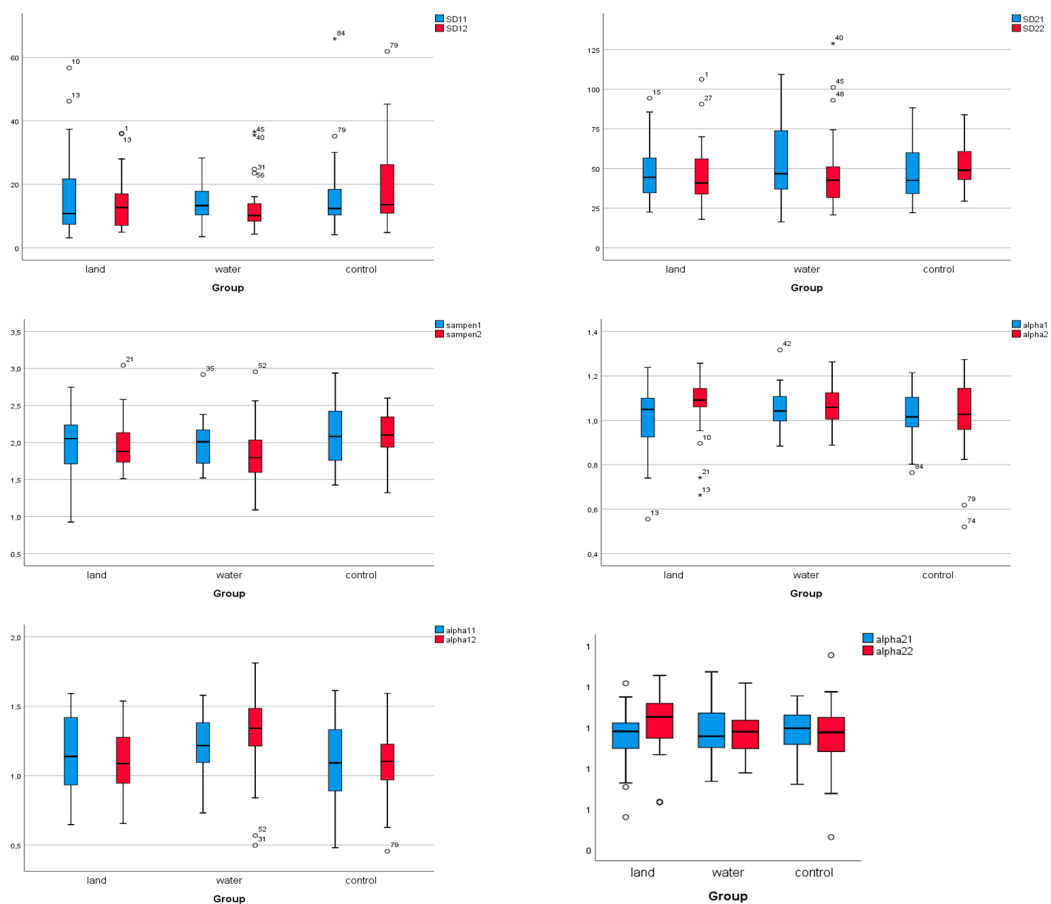

**Figure S3.** Change in Poincaré and nonlinear HRV parameters for the three study groups at baseline and after training.
